# Supplementary material for: A Quest of Great Importance-Developing a Broad Spectrum Escherichia coli Phage Collection
Source: MDPI journal article supplement (doi:10.3390/v11100899), 2019-09-26
Supplement: s1 [file s1]

# 1    **Supplementary files**

2    Table S1. Putative functions of CM1 tail structural proteins based on HHpred analysis.

| <i>orf</i> no. | Product size<br>(number of aa) | Putative function                | Organism / virus                        | ID     | Aligned positions | Probability | E-value |
|----------------|--------------------------------|----------------------------------|-----------------------------------------|--------|-------------------|-------------|---------|
| 36             | 1199                           | Tail protein<br>(proximal tail?) | <i>Enterobacteria</i><br>phage Mu       | 1WRU_A | 192               | 95.31       | 0.19    |
| 37             | 141                            | Lysin                            | <i>Streptococcus</i><br><i>pyogenes</i> | 5UDN_B | 87                | 85.04       | 11      |
| 38             | 183                            | Tail protein<br>(hinge?)         | <i>Enterobacteria</i><br>phage Mu       | 1WRU_A | 90                | 82.65       | 23      |
| 39             | 196                            | Small distal<br>protein          | <i>Escherichia</i> phage<br>T5          | 6F2M_D | 191               | 99.96       | 4.2e-30 |
| 40             | 1266                           | Large distal<br>protein (RBP?)   | <i>Salmonella</i> phage<br>vB_SenMS16   | 6F45_C | 125               | 99.25       | 7.3e-14 |

3

4

5

6 Table S2. Genes and predicted gene products (predicted by HMMER and BLASTp analysis) of the novel phage JK16.

| Gene           |            |                               | Gene product     |                                             |                                         |                  |                   |          |
|----------------|------------|-------------------------------|------------------|---------------------------------------------|-----------------------------------------|------------------|-------------------|----------|
| <i>Orf</i> no. | Base range | Strand (+ forward, - reverse) | Size (no. of aa) | Predicted function                          | Organism / virus                        | Accession number | Aligned positions | E-value  |
| 1              | 1..930     | -                             | 309              | DNA primase                                 | <i>Escherichia</i> phage vB_EcoS-IME253 | APU93271.1       | 297               | 2.6E-87  |
| 2              | 986..1462  | -                             | 158              | Transcriptional regulator                   | <i>Salmonella</i> phage vB_SenS_PHB07   | AVQ09770.1       | 139               | 3.7E-65  |
| 3              | 1550..3547 | +                             | 665              | ATP-dependent helicase                      | <i>Escherichia coli</i>                 | STH69015.1       | 498               | 9.3E-189 |
| 4              | 3547..3966 | +                             | 139              | VRR-NUC domain-containing protein; nuclease | <i>Clostridium sp. AM09-51</i>          | WP_118366912.1   | 114               | 3E-39    |
| 5              | 4047..4772 | +                             | 241              | DNA N-6-adenine methyltransferase           | <i>Klebsiella pneumoniae</i>            | SSH28087.1       | 212               | 4.5E-67  |
| 6              | 4777..5034 | +                             | 85               | Hypothetical protein                        | <i>Shigella</i> phage pSf-1             | YP_008059729.1   | 72                | 3.7E-34  |
| 7              | 5110..5289 | +                             | 59               | Hypothetical protein                        | <i>Shigella</i> phage pSf-1             | YP_008059730.1   | 59                | 4E-18    |
| 8              | 5279..5521 | +                             | 80               | Hypothetical protein                        | <i>Escherichia</i> phage vB_Eco_swan01  | SMH63962.1       | 80                | 5E-51    |
| 9              | 5466..6731 | +                             | 421              | Phosphoesterase                             | <i>Escherichia</i> phage EBCP5          | YP_009146399.1   | 372               | 4.3E-141 |
| 10             | 6877..7092 | +                             | 71               | Holin                                       | <i>Escherichia</i> phage vB_EcoS-IME253 | APU93209.1       | 71                | 1.4E-33  |

|    |              |   |     |                      |                                             |                |     |          |
|----|--------------|---|-----|----------------------|---------------------------------------------|----------------|-----|----------|
| 11 | 7092..7583   | + | 163 | Lysozyme             | <i>Shigella sonnei</i>                      | WP_072107586.1 | 157 | 6.9E-84  |
| 12 | 7580..7975   | + | 131 | Putative spanin      | <i>Klebsiella</i> phage<br>vB_KpnS_KpV522   | AOZ65328.1     | 130 | 4.5E-48  |
| 13 | 7975..8130   | + | 51  | Hypothetical protein | No match                                    | -              | -   | -        |
| 14 | 8413..8808   | - | 131 | Hypothetical protein | <i>Escherichia</i> phage<br>vB_Eco_SLUR29   | VUE36004.1     | 131 | 7E-93    |
| 15 | 8805..10385  | - | 526 | DNA primase          | <i>Candidatus Berkiella aquae</i>           | KRG21871.1     | 526 | 4.9E-153 |
| 16 | 10454..1675  | - | 73  | Hypothetical protein | <i>Escherichia</i> phage<br>vB_Eco_swan01   | SMH63954.1     | 73  | 3E-44    |
| 17 | 10662..11183 | - | 173 | HNH endonuclease     | <i>Idiomarina zobellii</i>                  | SDF27146.1     | 163 | 2.4E-36  |
| 18 | 11147..11374 | - | 75  | Hypothetical protein | <i>Citrobacter</i> virus<br>Stevie          | YP_009148752.1 | 72  | 4.9E-33  |
| 19 | 11446..12156 | - | 236 | DNA methylase        | <i>Shewanella</i> sp. phage<br>3/49         | YP_009103945.1 | 236 | 1.0E-77  |
| 20 | 12167..12391 | - | 74  | Hypothetical protein | <i>Klebsiella</i> phage<br>KOX1             | ARM70371.1     | 74  | 1.5E-32  |
| 21 | 12388..12504 | - | 38  | Hypothetical protein | <i>Escherichia</i> phage<br>vB_EcoS-95      | ASV44824.1     | 38  | 8.6e-25  |
| 22 | 12546..12773 | - | 75  | Hypothetical protein | <i>Escherichia</i> phage<br>vB_EcoS-95      | ASV44825.1     | 75  | 2E-47    |
| 23 | 12882..13094 | - | 70  | Hypothetical protein | <i>Escherichia</i> virus<br>vB_Eco_mar001J1 | VCU43720.1     | 70  | 4.3E-38  |
| 24 | 13094..13291 | - | 65  | Hypothetical protein | <i>Escherichia</i> phage                    | QBQ81534.1     | 65  | 1.7E-37  |

|    |              |   |     |                                                       |                                           |                |     |         |
|----|--------------|---|-----|-------------------------------------------------------|-------------------------------------------|----------------|-----|---------|
|    |              |   |     |                                                       | vB_EcoS_G29-2                             |                |     |         |
| 25 | 13367..13630 | - | 87  | Hypothetical protein                                  | <i>Escherichia</i> phage<br>vB_Eco_swan01 | SMH63947.1     | 88  | 4.7E-55 |
| 26 | 13857..14066 | - | 69  | Hypothetical protein                                  | <i>Escherichia</i> phage<br>vB_Eco_SLUR29 | VUE35992.1     | 69  | 5E-43   |
| 27 | 14054..14320 | - | 88  | Hypothetical protein                                  | <i>Escherichia</i> phage<br>vB_Eco_swan01 | SMH63944.1     | 88  | 4E-58   |
| 28 | 14320..14592 | - | 90  | Hypothetical protein                                  | <i>Escherichia</i> phage<br>vB_Eco_swan01 | SMH63943.1     | 90  | 3E-60   |
| 29 | 15269..15451 | + | 61  | Hypothetical protein                                  | <i>Shigella</i> phage pSf-1               | YP_008059755.1 | 105 | 5e-16   |
| 30 | 15854..16318 | + | 154 | Hypothetical protein                                  | <i>Salmonella</i> phage<br>YSP2           | ATW57845.1     | 157 | 3E-36   |
| 31 | 16315..16587 | + | 90  | DUF4884 domain-<br>containing hypothetical<br>protein | <i>Klebsiella pneumoniae</i>              | WP_119177099.1 | 91  | 4E-12   |
| 32 | 16830..17012 | + | 60  | Hypothetical protein                                  | <i>Escherichia</i> phage<br>vB_Eco_swan01 | SMH63940.1     | 60  | 4E-34   |
| 33 | 17028..18152 | + | 374 | Hypothetical protein                                  | <i>Escherichia</i> phage<br>vB_Eco_swan01 | SMH63939.1     | 297 | 4E-149  |
| 34 | 18229..18381 | + | 50  | Hypothetical protein                                  | <i>Escherichia</i> phage<br>vB_EcoS_SH2   | ARW57197.1     | 50  | 4.6E-30 |
| 35 | 18451..18672 | + | 73  | Hypothetical protein                                  | <i>Escherichia</i> phage<br>vB_EcoS_G29-2 | QBQ81460.1     | 73  | 8.6E-49 |
| 36 | 18669..18914 | + | 81  | Hypothetical protein                                  | <i>Escherichia</i> phage                  | ASV44844.1     | 81  | 6.7E-56 |

|    |              |   |     |                                       |                                                      |                |     |         |
|----|--------------|---|-----|---------------------------------------|------------------------------------------------------|----------------|-----|---------|
|    |              |   |     |                                       | <i>vB_EcoS-95</i>                                    |                |     |         |
| 37 | 18901..19122 | + | 73  | Hypothetical protein                  | <i>Escherichia</i> phage<br><i>vB_Eco_swan01</i>     | SMH63936.1     | 73  | 4.6E-51 |
| 38 | 19134..19673 | + | 179 | Polynucleotide kinase                 | <i>Escherichia</i> phage<br><i>vB_EcoS-95</i>        | ASV44846.1     | 177 | 1.5E-57 |
| 39 | 19670..19831 | + | 53  | Hypothetical protein                  | <i>Escherichia</i> phage<br><i>vB_Eco_swan01</i>     | SMH63934.1     | 53  | 2E-31   |
| 40 | 19904..20167 | + | 87  | Hypothetical protein                  | <i>Escherichia</i> phage<br><i>vB_Eco_swan01</i>     | SMH63933.1     | 87  | 1E-56   |
| 41 | 20164..20348 | + | 61  | Hypothetical<br>transmembrane protein | <i>Enterobacteria</i> phage<br><i>vB_EcoS_IME347</i> | AWD92206.1     | 63  | 1.4E-28 |
| 42 | 20561..21151 | + | 196 | ATP-binding protein                   | <i>Escherichia</i> phage<br><i>vB_Eco_SLUR29</i>     | VUE35983.1     | 196 | 9E-138  |
| 43 | 21222..21623 | + | 133 | Hypothetical protein                  | <i>Escherichia</i> phage<br><i>vB_Eco_swan01</i>     | SMH63929.1     | 133 | 2E-89   |
| 44 | 21723..21971 | + | 82  | Hypothetical protein                  | <i>Escherichia</i> phage<br><i>vB_EcoS-95</i>        | ASV44854.1     | 82  | 3E-53   |
| 45 | 21979..22161 | + | 60  | Hypothetical protein                  | <i>Escherichia</i> phage<br><i>vB_Eco_swan01</i>     | SMH63927.1     | 60  | 3E-33   |
| 46 | 22173..22463 | + | 96  | Hypothetical protein                  | <i>Shigella</i> phage pSf-1                          | YP_008059774.1 | 92  | 7.3E-47 |
| 47 | 22539..22751 | + | 70  | Hypothetical protein                  | <i>Escherichia</i> phage<br><i>vB_EcoS-95</i>        | ASV44857.1     | 70  | 2E-42   |
| 48 | 22748..22981 | + | 77  | Hypothetical protein                  | <i>Escherichia</i> phage<br><i>vB_Eco_swan01</i>     | SMH63924.1     | 77  | 1E-49   |

|    |              |   |     |                                           |                                            |                |     |          |
|----|--------------|---|-----|-------------------------------------------|--------------------------------------------|----------------|-----|----------|
| 49 | 22978..23292 | + | 104 | Hypothetical protein                      | <i>Escherichia</i> virus TLS               | SMH63923.1     | 104 | 8E-72    |
| 50 | 23363..23491 | + | 42  | Hypothetical protein                      | <i>Shigella</i> phage pSf-1                | YP_008059777.1 | 42  | 2E-12    |
| 51 | 23491..23721 | + | 76  | Putative fusion protein                   | <i>Escherichia</i> phage<br>vB_EcoS-95     | ASV44861.1     | 76  | 4E-50    |
| 52 | 23884..24117 | + | 77  | Hypothetical protein                      | <i>Shigella</i> phage pSf-1                | SMH63920.1     | 77  | 9E-49    |
| 53 | 24074..24259 | + | 61  | Hypothetical protein                      | <i>Salmonella</i> phage 36                 | YP_009223428.1 | 60  | 5E-23    |
| 54 | 24256..24480 | + | 74  | Hypothetical protein                      | <i>Escherichia</i> phage<br>vB_Eco_swan01  | SMH63918.1     | 74  | 1E-44    |
| 55 | 24559..25086 | + | 175 | Terminase small subunit                   | <i>Escherichia</i> phage<br>vB_EcoS-95     | ASV44865.1     | 175 | 1E-125   |
| 56 | 25086..26654 | + | 522 | Terminase large subunit                   | <i>Belnapia rosea</i>                      | SDB74991.1     | 424 | 4.7E-161 |
| 57 | 26725..28017 | + | 430 | Portal protein                            | <i>Vibrio</i> phage<br>vB_VchM-138         | YP_007006412.1 | 396 | 1.9E-117 |
| 58 | 28014..28769 | + | 251 | Phage head<br>morphogenesis protein       | <i>Rosenbergiella</i><br><i>nectarea</i>   | WP_092674814.1 | 258 | 7.3E-89  |
| 59 | 28780..29895 | + | 371 | Major head subunit<br>precursor           | <i>Citrobacter</i> virus<br>Stevie         |                |     | 2.1E-81  |
| 60 | 29908..30417 | + | 169 | Putative zonula occludens<br>toxin        | <i>Salmonella</i> phage 36                 | YP_009223443.1 | 157 | 3E-57    |
| 61 | 30468..31250 | + | 260 | Scaffolding protein SbcC-<br>like protein | <i>Salmonella</i> phage 36                 | YP_009223444.1 | 250 | 5E-31    |
| 62 | 31341..32312 | + | 323 | Major capsid protein                      | <i>Faecalibacterium</i><br>phage FP_Brigit | AUV56656.1     | 303 | 4.0E-105 |
| 63 | 32371..32637 | + | 88  | Hypothetical protein                      | <i>Escherichia</i> phage                   | ASV44873.1     | 88  | 2.1E-37  |

|    |              |   |      |                                                              |                                           |                |      |          |
|----|--------------|---|------|--------------------------------------------------------------|-------------------------------------------|----------------|------|----------|
|    |              |   |      |                                                              | vB_EcoS-95                                |                |      |          |
| 64 | 32684..33103 | + | 139  | Hypothetical protein                                         | <i>Klebsiella</i> phage<br>PKP126         | YP_009284937.1 | 129  | 1.8E-60  |
| 65 | 33100..33474 | + | 124  | Hypothetical protein                                         | <i>Escherichia</i> phage<br>RES-2009a     | ACZ74600.1     | 124  | 1.2E-51  |
| 66 | 33464..33907 | + | 147  | Putative tail protein                                        | <i>Escherichia coli</i>                   | WP_137576084.1 | 142  | 4E-32    |
| 67 | 33897..34298 | + | 133  | Putative tail protein                                        | <i>Citrobacter</i> virus<br>Stevie        | YP_009148719.1 | 129  | 5E-56    |
| 68 | 34301..34963 | + | 220  | Putative major tail protein                                  | <i>Salmonella</i> virus<br>SP126          | YP_009617994.1 | 219  | 4E-121   |
| 69 | 35063..35380 | + | 105  | Tape measure chaperone                                       | <i>Escherichia</i> phage<br>vB_EcoS-95    | ASV44879.1     | 105  | 5E-72    |
| 70 | 35737..38418 | + | 893  | Tail tape measure protein<br>(tail component of<br>prophage) | <i>Escherichia coli</i>                   | CTT34890.1     | 782  | 1.1E-294 |
| 71 | 38421..38771 | + | 116  | Tail protein                                                 | <i>Escherichia</i> phage<br>vB_EcoS-95    | ASV44882.1     | 116  | 6E-81    |
| 72 | 38835..39596 | + | 253  | Minor tail protein                                           | <i>Shigella sonnei</i>                    | WP_072120829.1 | 214  | 9.3E-134 |
| 73 | 39596..40327 | + | 243  | Tail assembly protein                                        | <i>Shigella sonnei</i>                    | CSQ47716.1     | 182  | 6.8E-77  |
| 74 | 40308..40904 | + | 198  | Tail assembly protein                                        | <i>Haemophilus</i><br><i>influenzae</i>   | WP_136439541.1 | 154  | 2.3E-82  |
| 75 | 40983..44561 | + | 1192 | Tail protein                                                 | <i>Escherichia</i> phage<br>vB_Eco_swan01 | SMH63897.1     | 1192 | 0.0      |
| 76 | 44588..45202 | - | 204  | Hypothetical protein                                         | <i>Escherichia</i> phage                  | SMH63896.1     | 204  | 2E-148   |

|    |              |   |     |                                         |                                              |                |     |          |
|----|--------------|---|-----|-----------------------------------------|----------------------------------------------|----------------|-----|----------|
|    |              |   |     |                                         | vB_Eco_swan01                                |                |     |          |
| 77 | 45483..45752 | - | 89  | Hypothetical protein                    | <i>Escherichia</i> phage<br>Jahat_MG145      | QBZ71356.1     | 89  | 1.7E-40  |
| 78 | 46254..47309 | + | 351 | Exodeoxyribonuclease<br>VIII            | <i>Snodgrassella alvi</i>                    | WP_100139585.1 | 264 | 3.5E-85  |
| 79 | 47385..47642 | + | 85  | Hypothetical protein                    | <i>Escherichia</i> phage<br>vB_Eco_swan01    | SMH63892.1     | 85  | 1E-52    |
| 80 | 47646..48299 | + | 217 | Recombinase                             | <i>Escherichia</i> virus TLS                 | YP_001285543.1 | 221 | 9.0E-72  |
| 81 | 48343..48795 | + | 150 | Single-stranded DNA-<br>binding protein | <i>Escherichia</i> phage<br>vB_Eco_SLUR29    | VUE36021.1     | 150 | 6E-106   |
| 82 | 48828..49502 | - | 224 | Chaperone of<br>endosialidase           | <i>Escherichia</i> phage<br>Jahat_MG145      | QBZ71352.1     | 231 | 5Ee-144  |
| 83 | 49515..49793 | - | 92  | Hypothetical protein                    | <i>Escherichia</i> phage<br>vB_Eco_swan01    | SMH63888.1     | 92  | 2E-57    |
| 84 | 49793..51748 | - | 651 | Putative tail fiber protein             | <i>Escherichia</i> virus<br>vB_Eco_mar004NP2 | VCU43554.1     | 547 | 1.3E-175 |

7 Table S3. Putative functions of a few of the JK16 tail structural proteins; the functions were estimated via HHpred software.

| orf no. | Product size<br>(number of aa) | Putative<br>function(s)                                                      | Organism / virus                                                                                              | ID                                   | Aligned positions           | Probability (%)                    |
|---------|--------------------------------|------------------------------------------------------------------------------|---------------------------------------------------------------------------------------------------------------|--------------------------------------|-----------------------------|------------------------------------|
| 61      | 260                            | Tail tube protein;<br><br>Cell adhesion<br>domain                            | <i>Escherichia</i><br>phage T5;<br><i>Escherichia coli</i>                                                    | 5NGJ_B;<br><br>3NCX_B                | 100;<br><br>64              | 98.02;<br><br>96.08                |
| 68      | 220                            | Major tail protein;<br><br>Portal protein;<br><br>Baseplate wedge<br>protein | <i>Enterobacteria</i><br>phage lambda;<br><i>Bacillus</i> phage<br>SPP1;<br><i>Enterobacteria</i><br>phage T4 | 2K4Q_A;<br><br>5A21_H;<br><br>5IV5_o | 119;<br><br>114;<br><br>103 | 99.54 ;<br><br>98.58;<br><br>67.81 |
| 73      | 243                            | (Tail associated)<br>lysin                                                   | <i>Streptococcus</i><br><i>pyogenes</i>                                                                       | 5UDN_B                               | 119                         | 96.99                              |
| 75      | 1192                           | Tail protein<br>(RBP?)                                                       | Prophage MuSo2                                                                                                | 3CDD_E                               | 161                         | 94.62                              |

8

9
